# Supplementary material for: Effects of Anthropogenic Pollutants on Biogenic Secondary Organic Aerosol Formation in the Atmosphere of Mt. Hua, China
Source: Copernicus journal article supplement (doi:10.5194/egusphere-2025-1668), 2025-04-15
Supplement: Supplementary file 1 [file egusphere-2025-1668-supplement.pdf]

# **Effects of Anthropogenic Pollutants on Biogenic Secondary Organic Aerosol Formation in the Atmosphere of Mt. Hua, China**

Can Wu<sup>1,2</sup>, Yubao Cheng<sup>1</sup>, Yuwei Sun<sup>1</sup>, Huijun Zhang<sup>1</sup>, Si Zhang<sup>1</sup>, Cong Cao<sup>3\*</sup>, Jianjun Li<sup>3</sup>, Gehui Wang<sup>1,2\*</sup>

<sup>1</sup>Key Lab of Geographic Information Science of the Ministry of Education, School of Geographic Sciences, East China Normal University, Shanghai 210062, China

<sup>2</sup> Institute of Eco-Chongming, 3663 North Zhongshan Road, Shanghai 200062, China

<sup>3</sup>State Key Laboratory of Loess and Quaternary Geology, Institute of Earth Environment, Chinese Academy of Sciences, Xi'an 710061, China

\*Now at Department of Chemistry, Hong Kong University of Science & Technology

\*Corresponding author. Por. Gehui Wang,

Mailing address: School of Geographic Sciences, East China Normal University, Shanghai 210062, China

E-mail address: [ghwang@geo.ecnu.edu.cn](mailto:ghwang@geo.ecnu.edu.cn), or [wanggh@ieecas.cn](mailto:wanggh@ieecas.cn) (Gehui Wang)

### Text S1 Estimation the IEPOX reactive uptake on particles at MS site

To quantitatively assess the effects of aerosol water on isoprene-derived SOA formation, the pseudo-first-order heterogeneous reaction rate constant for IEPOX uptake to particle ( $k_{\text{het}}$ , 1/s) is calculated using the method of Gaston et al. (2014), in which the gas phase diffusion is not considered due to its minor effects on  $k_{\text{het}}$  (eq. (1)). And the possibility of IEPOX reactive uptake (i.e., uptake coefficient,  $\gamma_{\text{IEPOX}}$ ) was also calculated using eqs 2-3.

$$k_{\text{het}} \approx \frac{\gamma_{\text{IEPOX}} S_a \omega}{4} \quad \text{Eq. (1)}$$

$$\frac{1}{\gamma_{\text{IEPOX}}} = \frac{R_p \omega}{4 D_g} + \frac{1}{\alpha} + \frac{1}{\Gamma_{\text{aq}}} \quad \text{Eq. (2)}$$

$$\Gamma_{\text{aq}} = \frac{4 V R T H_{\text{aq}} k_{\text{aq}}}{S_a \omega} \quad \text{Eq. (3)}$$

$$k_{\text{aq}} = (k_{\text{H}^+} [\text{H}^+]) + (k_{\text{nuc}} [\text{nuc}] \alpha_{\text{H}^+}) + k_{\text{ga}} [\text{ga}] \quad \text{Eq. (4)}$$

Where  $S_a$  represents the total surface area concentration of particles ( $\text{cm}^2/\text{cm}^3$ ); The  $S_a$ , particle radius ( $R_p$ , m) and total particle volume ( $V$ ,  $\text{cm}^3/\text{cm}^3$ ) were measured using a scanning mobility particle sizer (SMPS) here, more details can be found elsewhere (Cao, 2018). In equations 2-3,  $\omega$  is the mean molecular speed of an epoxide molecule (231 m/s, at 298 K),  $D_g$  the gas-phase diffusion coefficient ( $0.1 \text{ cm}^2/\text{s}$ );  $\alpha$  is the mass accommodation coefficient, with a mean value of 0.1.  $R$  is the universal gas constant ( $\text{L atm/mol K}$ ),  $T$  represent the temperature (K). The Henry's law coefficient in the aqueous phase,  $H_{\text{aq}}$ , is estimated to be  $1.7 \times 10^8$  (M/atm). The pseudo-first-order aqueous-phase rate constant,  $k_{\text{aq}}$  (1/s), is based on an acid-catalyzed, epoxide ring-open mechanism.  $k_{\text{H}^+}$  is the reaction rate taken to be 0.036 (M/s);  $[\text{H}^+]$  and  $\alpha_{\text{H}^+}$  are the concentration (mol/L) and activity of proton, respectively.  $k_{\text{nuc}}$  is the reaction rate due to the presence of specific nucleophiles (e.g., sulfate, nitrate), which is estimated to be  $2.0 \times 10^4$  (M/s);  $[\text{nuc}]$  is the nucleophiles concentration (mol/L).  $[\text{ga}]$  represent the concentration of general acids (e.g., bisulfate, mol/L), of which reaction rate is taken to  $2.0 \times 10^4$  (M/s). All the key parameters applied here are consistent with Gaston et al. (2014).

**Table S1** RF model performance for testing dataset.

|                  | $R^2$ | MSE   | RMSE | MAE  |
|------------------|-------|-------|------|------|
| Training dataset | 0.91  | 0.012 | 0.11 | 0.07 |
| Testing dataset  | 0.80  | 0.008 | 0.09 | 0.07 |

Note: MSE: mean square error; RMSE: root-mean-square error; MAE: mean absolute error.

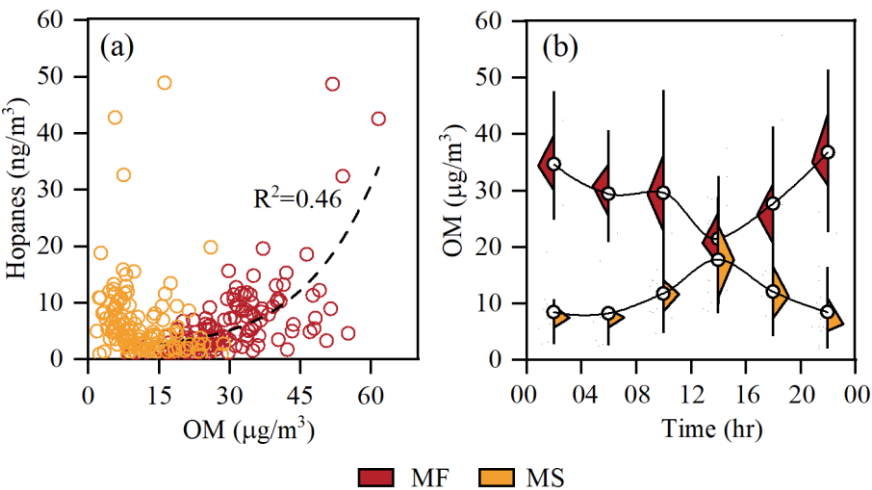

**Figure S1** The fit regressions for OM with hopanes **(a)** and diurnal cycle of OM **(b)** at both sampling sites.

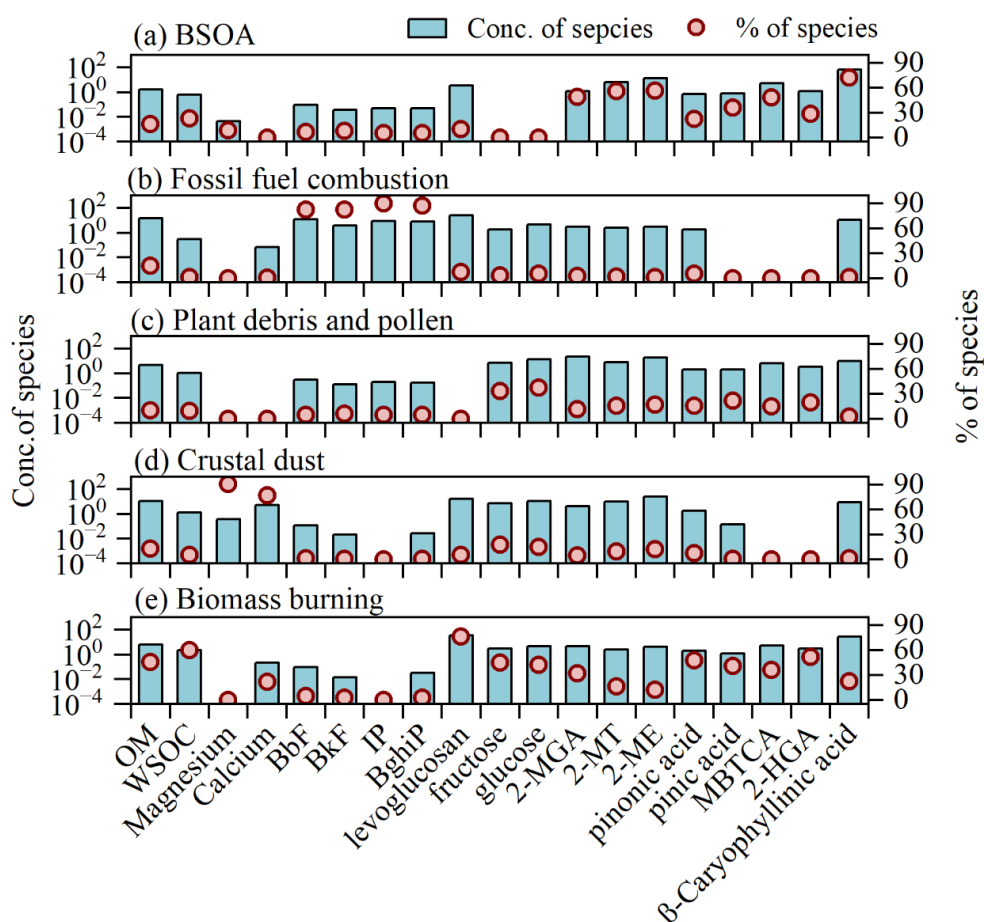

**Figure S2** Factor profiles resolved by PMF mode for OM source apportionment.

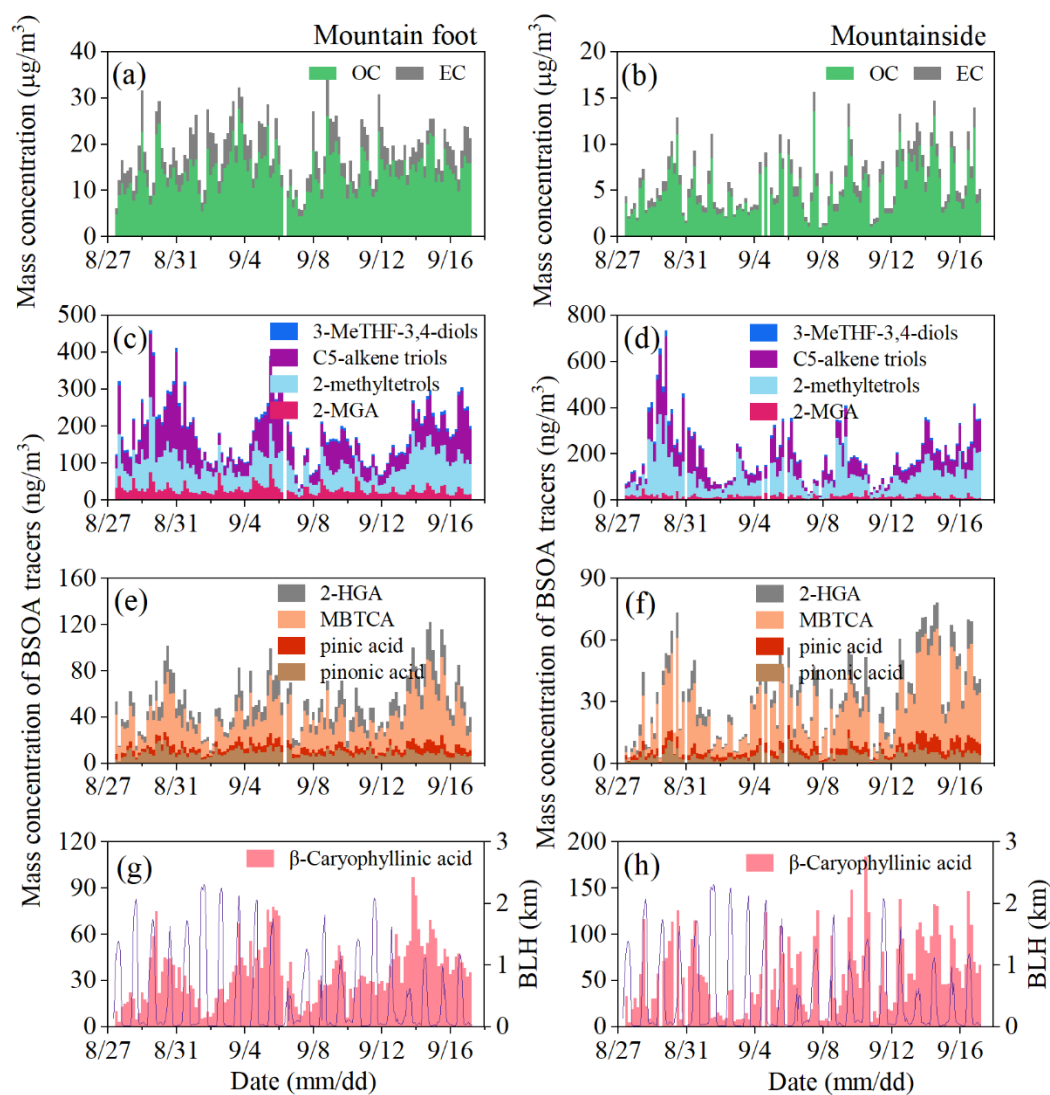

**Figure S3** Time series of the mass concentration of BSOA tracers and boundary layer height (BLH) at both sampling sites.

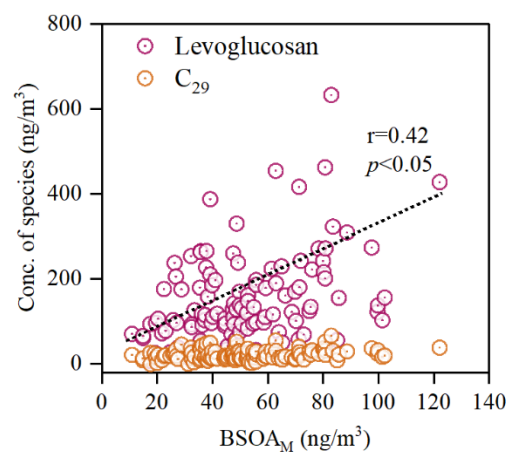

**Figure S4** Correlation of BSOA<sub>M</sub> with levoglucosan and C<sub>29</sub>-alkane at MF site.

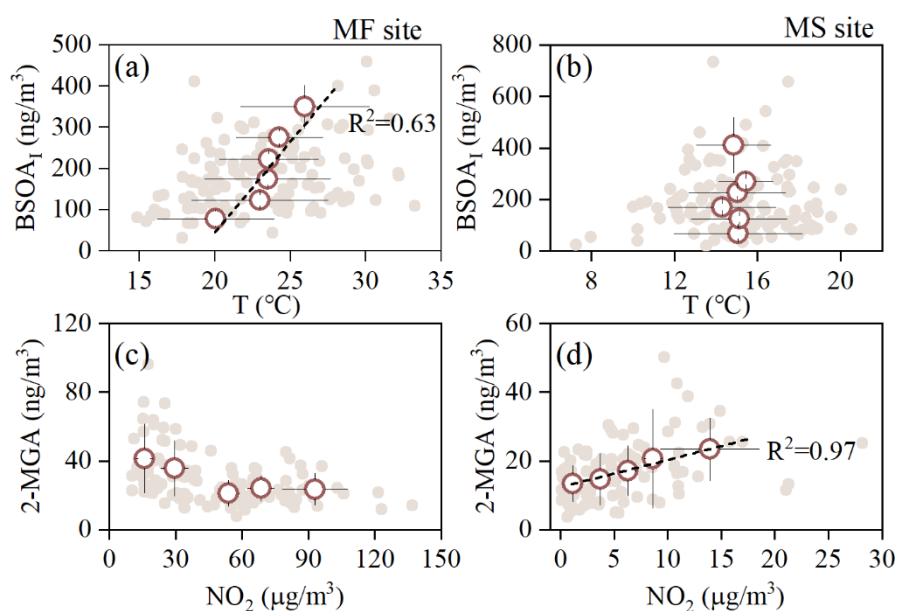

**Figure S5** Linear correlations of BSOA<sub>I</sub> with temperature (a and b), and 2-MGA with NO<sub>2</sub> (c and d) at both sampling sites.

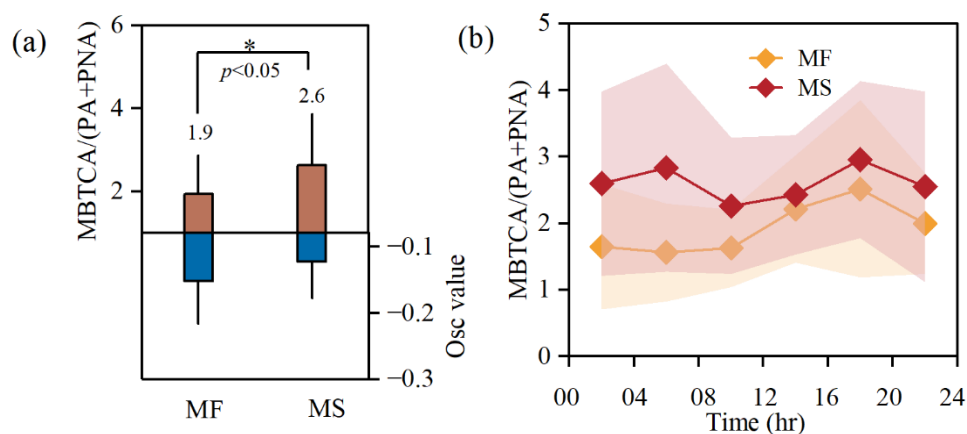

**Figure S6** A comparison of BSOA<sub>M</sub> tracer among two sampling sites; (a) aging state, (b) diurnal variation of MBTCA/(PA+PNA) ratio. (Error bar of Osc value has been reduced by half)

## References

- Cao, C.: Vertical distribution of physical and chemical characteristics of PM<sub>2.5</sub> at Mt. Hua and the new particle formation, 2018.
- Gaston, C. J., Riedel, T. P., Zhang, Z., Gold, A., Surratt, J. D., and Thornton, J. A.: Reactive Uptake of an Isoprene-Derived Epoxydiol to Submicron Aerosol Particles, *Environmental Science & Technology*, 48, 11178-11186, 10.1021/es5034266, 2014.
